# Supplementary material for: Climatic Changes and Anthropogenic Activities Driving the Increase in Nitrogen: Evidence from the South-to-North Water Diversion Project
Source: MDPI journal article supplement (doi:10.3390/w13182517), 2021-09-14
Supplement: s1 [file s1]

## Supplementary materials

**Table S1.** Urban and construction information of four surrounding regions along the MRP.

| Regions | Year | Urban Area<br>(km <sup>2</sup> ) | Completed<br>Urban Area<br>(km <sup>2</sup> ) | Total Resi-<br>dents<br>(Million) | Urban Resi-<br>dents<br>(Million) | Rural Resi-<br>dents (Mil-<br>lion) | Urbanization<br>Rate<br>(%) | Annual<br>Growth of<br>Urbanization<br>(%) |
|---------|------|----------------------------------|-----------------------------------------------|-----------------------------------|-----------------------------------|-------------------------------------|-----------------------------|--------------------------------------------|
| Henan   | 2019 | 5364                             | 2944                                          | 9640                              | 5129                              | 4511                                | 53.21%                      | 1.50%                                      |
|         | 2018 | 5132                             | 2797                                          | 9605                              | 4967                              | 4638                                | 51.71%                      | 1.55%                                      |
|         | 2017 | 5132                             | 2685                                          | 9559                              | 4795                              | 4764                                | 50.16%                      | 1.66%                                      |
|         | 2016 | 4823                             | 2544                                          | 9532                              | 4623                              | 4909                                | 48.50%                      | 1.65%                                      |
|         | 2015 | 4810                             | 2503                                          | 9480                              | 4441                              | 5039                                | 46.85%                      | 1.65%                                      |
| Hebei   | 2019 | 6309                             | 2182                                          | 7592                              | 4374                              | 3218                                | 57.61%                      | 1.18%                                      |
|         | 2018 | 5927                             | 2163                                          | 7556                              | 4264                              | 3292                                | 56.43%                      | 1.42%                                      |
|         | 2017 | 6907                             | 2120                                          | 7520                              | 4136                              | 3383                                | 55.01%                      | 1.69%                                      |
|         | 2016 | 6613                             | 2056                                          | 7470                              | 3983                              | 3487                                | 53.32%                      | 1.99%                                      |
|         | 2015 | 6399                             | 1944                                          | 7425                              | 3811                              | 3614                                | 51.33%                      | 2.00%                                      |
| Beijing | 2019 | 16410                            | 1469                                          | 2154                              | 1865                              | 289                                 | 86.58%                      | 0.09%                                      |
|         | 2018 | 16410                            | 1469                                          | 2154                              | 1863                              | 291                                 | 86.49%                      | -0.01%                                     |
|         | 2017 | 16410                            | 1446                                          | 2171                              | 1878                              | 293                                 | 86.50%                      | -0.01%                                     |
|         | 2016 | 16410                            | 1420                                          | 2173                              | 1880                              | 293                                 | 86.52%                      | 0.02%                                      |
|         | 2015 | 12187                            | 1401                                          | 2171                              | 1877                              | 293                                 | 86.50%                      | 0.16%                                      |
| Tianjin | 2019 | 2640                             | 1151                                          | 1562                              | 1304                              | 258                                 | 83.48%                      | 0.34%                                      |
|         | 2018 | 2585                             | 1078                                          | 1560                              | 1297                              | 263                                 | 83.14%                      | 0.23%                                      |
|         | 2017 | 2585                             | 1088                                          | 1557                              | 1291                              | 266                                 | 82.92%                      | 0.01%                                      |
|         | 2016 | 2583                             | 1008                                          | 1562                              | 1295                              | 267                                 | 82.91%                      | 0.30%                                      |
|         | 2015 | 2506                             | 885                                           | 1547                              | 1278                              | 269                                 | 82.61%                      | 0.34%                                      |
